# Supplementary material
Source: PubMed Central journal article supplement (PMC6751727)
Supplement: ao9b02305_si_001.pdf [file ao9b02305_si_001.pdf]

# **DNA G-quadruplexes Activate Heme for Robust Catalysis of Carbene Transfer Reactions**

Hanadi Ibrahim<sup>1</sup>, Paul Mulyk<sup>1</sup>, Dipankar Sen<sup>1,2\*</sup>

<sup>1</sup>Dept. of Chemistry and <sup>2</sup>Dept. of Molecular Biology & Biochemistry

Simon Fraser University

Burnaby, BC V5A 1S6, Canada

## **Supporting Information**

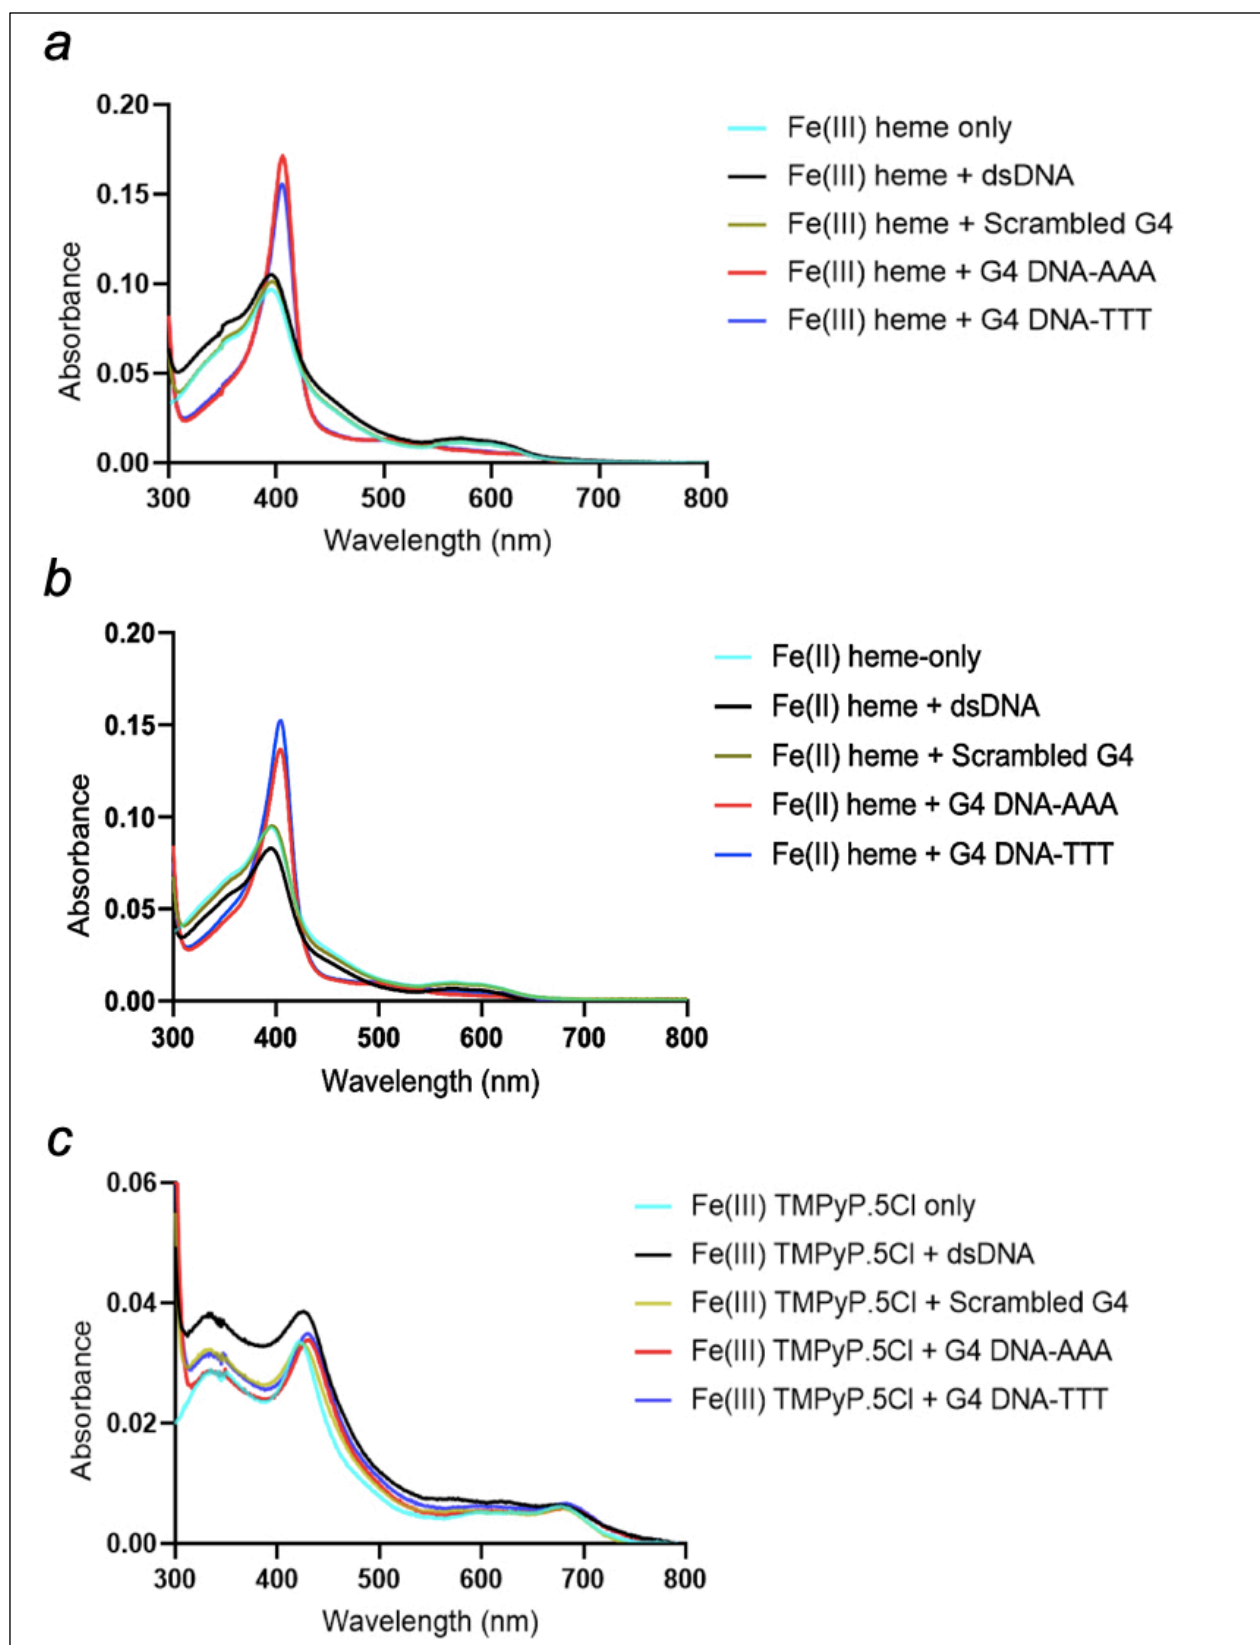

**Figure S1:** UV-vis absorption spectra of 2  $\mu\text{M}$  (a) ferric (b) ferrous heme and (c) ferric TMPyP4.5Cl in the presence and absence of “dsDNA”, “Scrambled G4” and “G4” DNA (10  $\mu\text{M}$  DNA) in a buffer: 40 mM HEPES-NH<sub>4</sub>OH, pH 8.0, 20 mM KCl, 1% DMF, 0.05% Triton X-100. Only (b) contained 10 mM Na<sub>2</sub>S<sub>2</sub>O<sub>4</sub>.

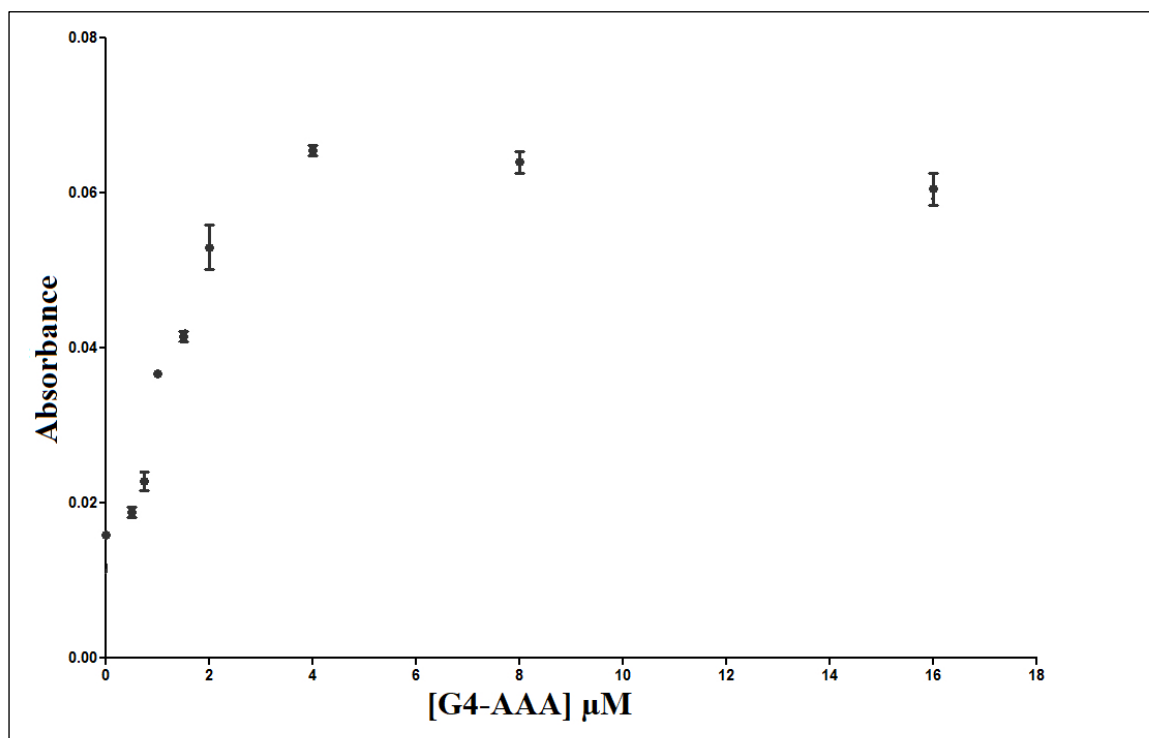

**Figure S2:** Absorbance measurements at 404 nm of 0.5  $\mu\text{M}$  ferrous heme titrated with 0-16  $\mu\text{M}$  “G4” DNA in a buffer: 40 mM HEPES- $\text{NH}_4\text{OH}$ , pH 8.0, 20 mM KCl, 1% DMF, 0.05% Triton X-100. The error bars represent one standard deviation from the mean, obtained from two independent experiments.

**Table S1:** Yields of cyclopropanation reaction using Fe(III)-heme catalysts under aerobic and anaerobic conditions with and without the reducing agent. Na<sub>2</sub>S<sub>2</sub>O<sub>4</sub>. Product yields were determined by GC analysis: 80 μM DNA, 30 μM Hemin, 1 mM Styrene, 7 mM EDA, 10 mM Na<sub>2</sub>S<sub>2</sub>O<sub>4</sub> in an aqueous buffer: 40 mM NH<sub>4</sub>-HEPES, pH 8.0, 20 mM KCl, 1% DMF, 0.05% Triton-X100.

|                              | – argon<br>– Na <sub>2</sub> S <sub>2</sub> O <sub>4</sub> | – argon<br>+ Na <sub>2</sub> S <sub>2</sub> O <sub>4</sub> | + argon<br>– Na <sub>2</sub> S <sub>2</sub> O <sub>4</sub> | + argon<br>+ Na <sub>2</sub> S <sub>2</sub> O <sub>4</sub> |
|------------------------------|------------------------------------------------------------|------------------------------------------------------------|------------------------------------------------------------|------------------------------------------------------------|
| Fe(III)-heme<br>no DNA       | -                                                          | -                                                          | 1                                                          | 2                                                          |
| Fe(III)heme<br>dsDNA         | -                                                          | -                                                          | 1                                                          | 3                                                          |
| Fe(III)-heme<br>Scrambled G4 | -                                                          | -                                                          | 6                                                          | 13                                                         |
| Fe(III)-heme<br>G4           | 4                                                          | 8                                                          | 36                                                         | 75                                                         |

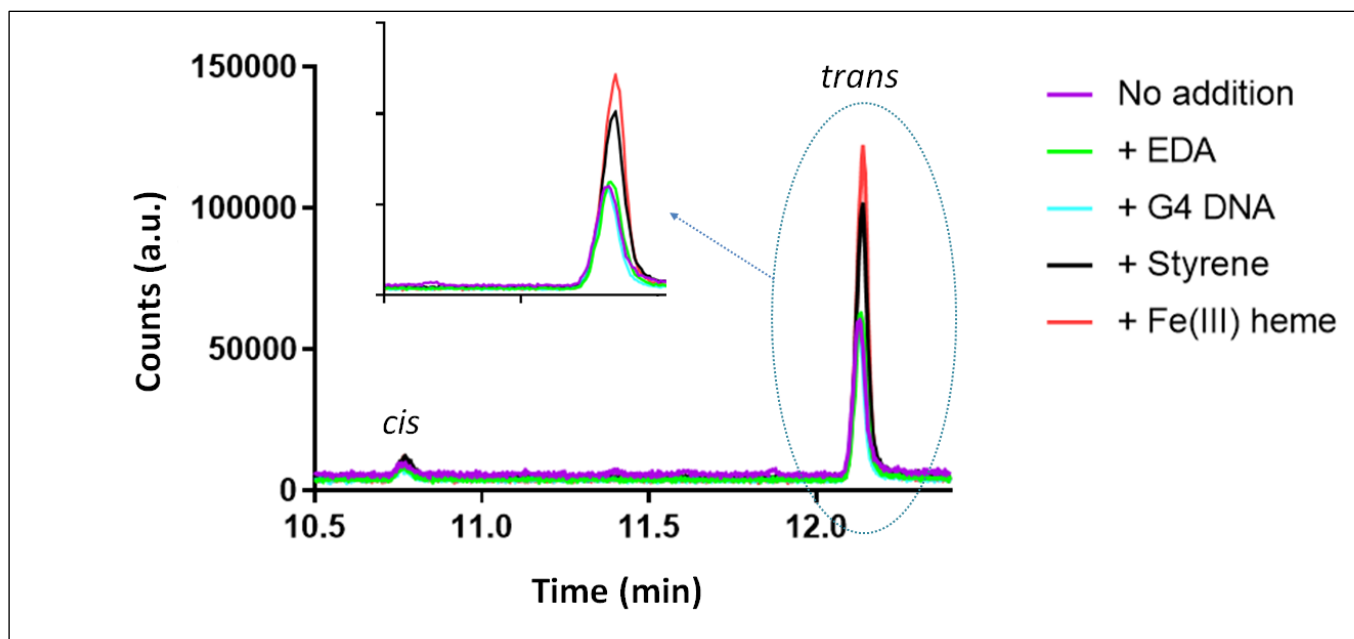

**Figure S3:** Effect of different reagent supplementations on the yield of 1-carbethoxy-2-phenylcyclopropane (cPr) products by the “G4” heme•DNAzyme. Five identical reaction solutions were prepared, each containing 17  $\mu\text{M}$  heme, 83  $\mu\text{M}$  G4 DNA, 1 mM styrene, 7 mM EDA, and 10 mM  $\text{Na}_2\text{S}_2\text{O}_4$  in a buffer solution consisting of 40 mM  $\text{NH}_4\text{-HEPES}$ , pH 8.0, 20 mM KCl, 1% DMF, and 0.05% Triton X-100. Following one hour of reaction, 10  $\mu\text{l}$  supplementations of one of the reaction components was added to a given reaction tube, in anaerobic fashion: (1) heme (to a final concentration of 33  $\mu\text{M}$ ); (2) styrene (to 2 mM); EDA (to 13 mM); “G4” DNA (to 116  $\mu\text{M}$ ). Following these single reagent supplementations, the various reactions were allowed to continue for one further hour prior to termination and extraction using ethyl acetate.

**Table S2** : Yields of carbene insertion reaction of styrene with EDA in the presence of heme•DNAzymes made of different GQs (“G4-T”, “G4-A”, “G4-TTT”, “G4-AAA” and “(dA<sub>4</sub>G<sub>5</sub>A<sub>4</sub>)<sub>4</sub>”). Reactions were carried out at 21°C for 1 hr, with 80 μM GQ DNA (asterisked samples contained 80 μM dA<sub>4</sub>G<sub>5</sub>A<sub>4</sub>; hence, ≤ 20 μM (dA<sub>4</sub>G<sub>5</sub>A<sub>4</sub>)<sub>4</sub> GQ following KCl incubation), 30 μM hemin, 7 mM EDA, 10 mM Na<sub>2</sub>S<sub>2</sub>O<sub>4</sub> in a buffer (40 mM NH<sub>4</sub>-HEPES, pH 8.0, 20 or 500 mM KCl, 1% DMF, 0.05% Triton X-100) under anaerobic conditions. cPr product yields were determined from GC analysis and are based on EDA as the limiting reagent.

| GQ DNA species                                                              | cPr Yield (%) |
|-----------------------------------------------------------------------------|---------------|
| G4-AAA (20 mM KCl)                                                          | 77 ± 3        |
| G4-AAA (500 mM KCl)                                                         | 79 ± 2        |
| G4-TTT (20 mM KCl)                                                          | 80 ± 2        |
| G4-TTT (500 mM KCl)                                                         | 79 ± 2        |
| G4-A (20 mM KCl)                                                            | 78 ± 2        |
| G4-T (20 mM KCl)                                                            | 77 ± 1        |
| RNA G4-AAA (20 mM KCl)                                                      | 78 ± 2        |
| *(dA <sub>4</sub> G <sub>5</sub> A <sub>4</sub> ) <sub>4</sub> (20 mM KCl)  | 51 ± 4        |
| *(dA <sub>4</sub> G <sub>5</sub> A <sub>4</sub> ) <sub>4</sub> (500 mM KCl) | 49 ± 3        |
| (dA <sub>4</sub> G <sub>5</sub> A <sub>4</sub> ) <sub>4</sub> (20 mM KCl)   | 92 ± 2        |

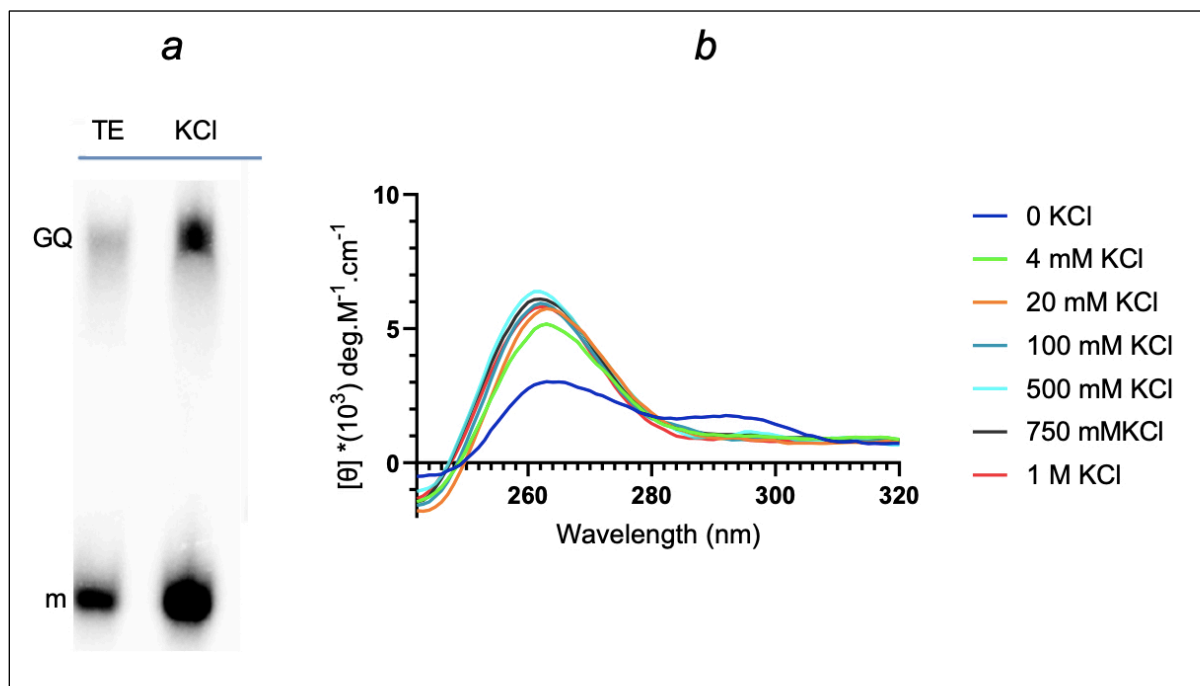

**Figure S4** *a*: Native gel electrophoresis to show the formation of a unique intermolecular GQ product from dA<sub>4</sub>G<sub>5</sub>A<sub>4</sub> upon incubation with buffered KCl (“m”: single-strand; “GQ”: G-quadruplex). *b*: Circular Dichroism (CD) spectra of the products of incubation of the DNA oligonucleotide “G4” (“G4-AAA”), at 20 μM, in the absence and presence of different KCl concentrations (0, 4, 20, 100, 500, 750, and 1000 mM, respectively) within the buffer of 40 mM HEPES-NH<sub>4</sub>OH, pH 8.0, 1% DMF, and 0.05% Triton X-100.
